# Supplementary material for: Markov Field network model of multi-modal data predicts effects of immune system perturbations on intravenous BCG vaccination in macaques
Source: PubMed Central journal article supplement — bioRxiv. 2024 Oct 30:2024.04.13.589359. Preprint. [Version 2] doi: 10.1101/2024.04.13.589359 (PMC11565837; doi:10.1101/2024.04.13.589359), 2024-10-30
Supplement: NIHPP2024.04.13.589359V2-supplement-1.pdf [file NIHPP2024.04.13.589359V2-supplement-1.pdf]

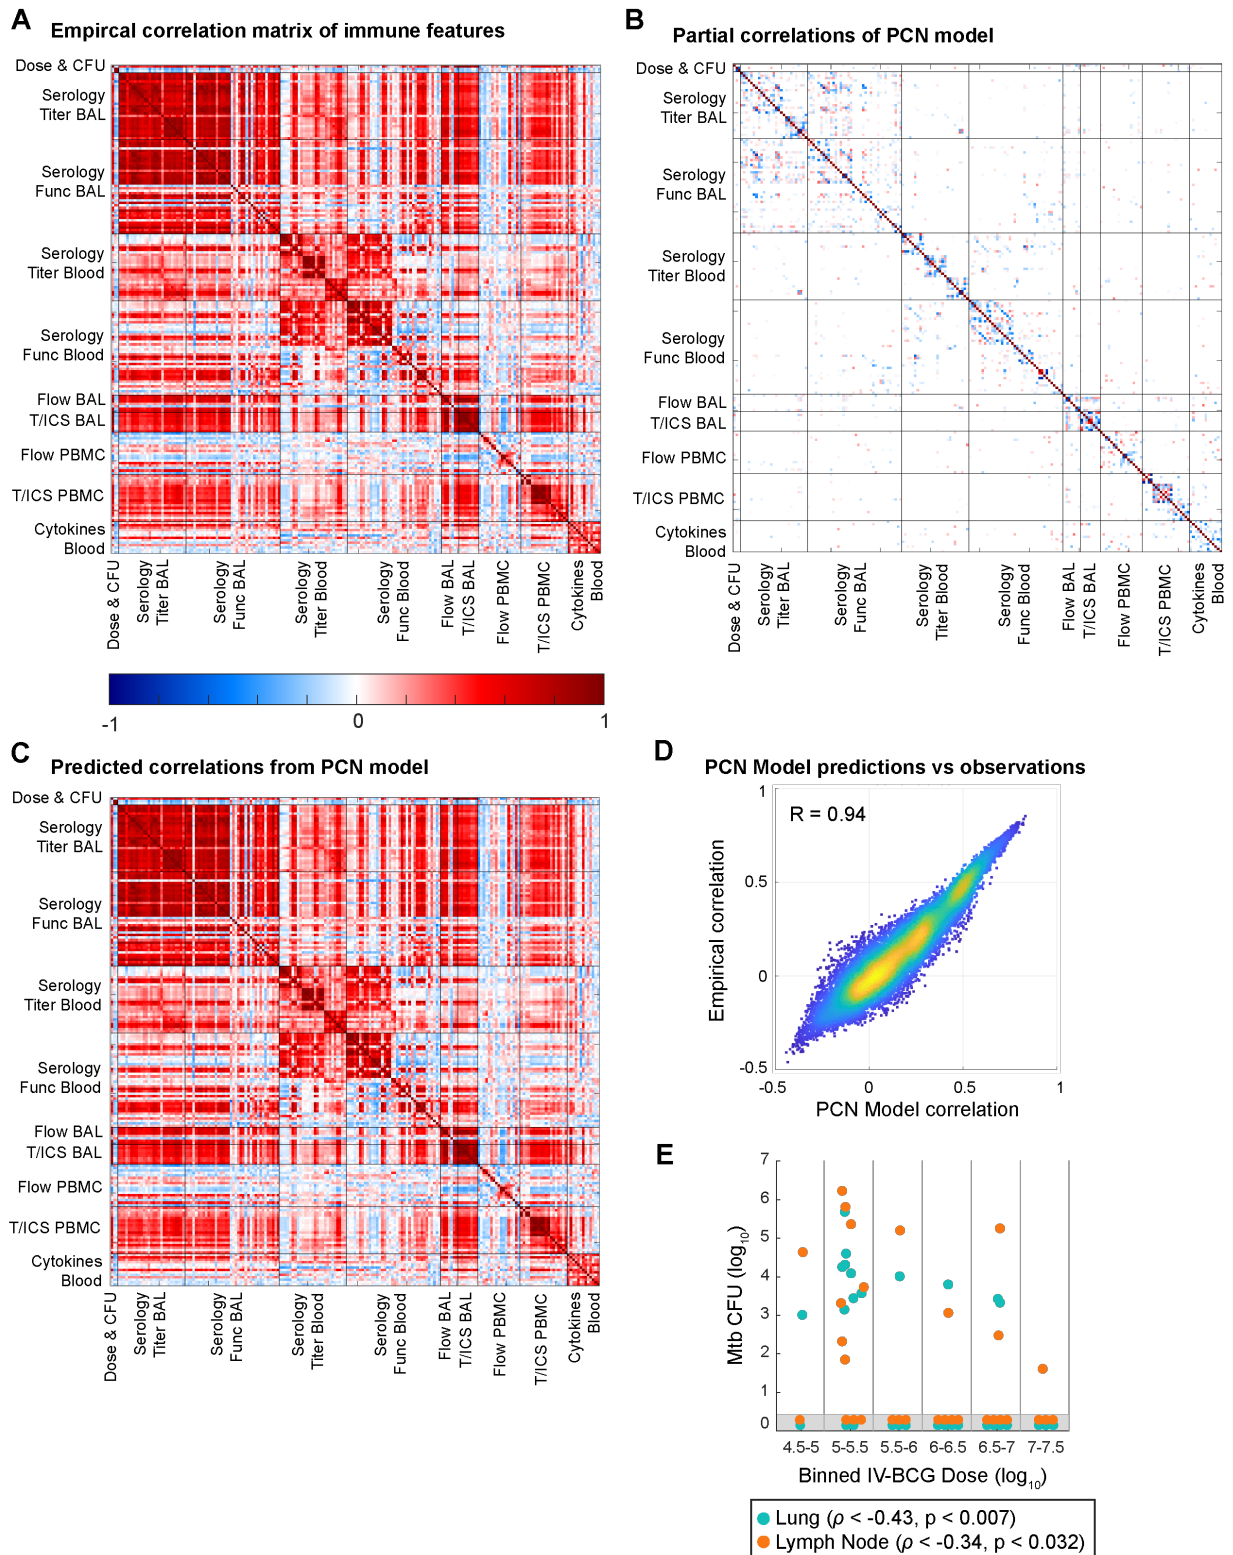

**Figure S1. Partial correlation network structure and predictions for IV-BCG vaccinated macaques.**

**A)** Observed correlation matrix between all immune features. **B)** Partial correlation matrix of the PCN. **C)** Predicted correlation matrix from PCN. **D)** Comparison of correlations observed empirically from the data versus predicted by the PCN. Entries are only included if there was no edge in the PCN

corresponding to that pair. **E)** Dependence of lung and lymph node CFU on IV-BCG dose. Spearman correlation, one-tailed.

**Partial correlations using single or multiple data modes**

S: Single Mode P: Predicted Single Mode M: Multiple Modes

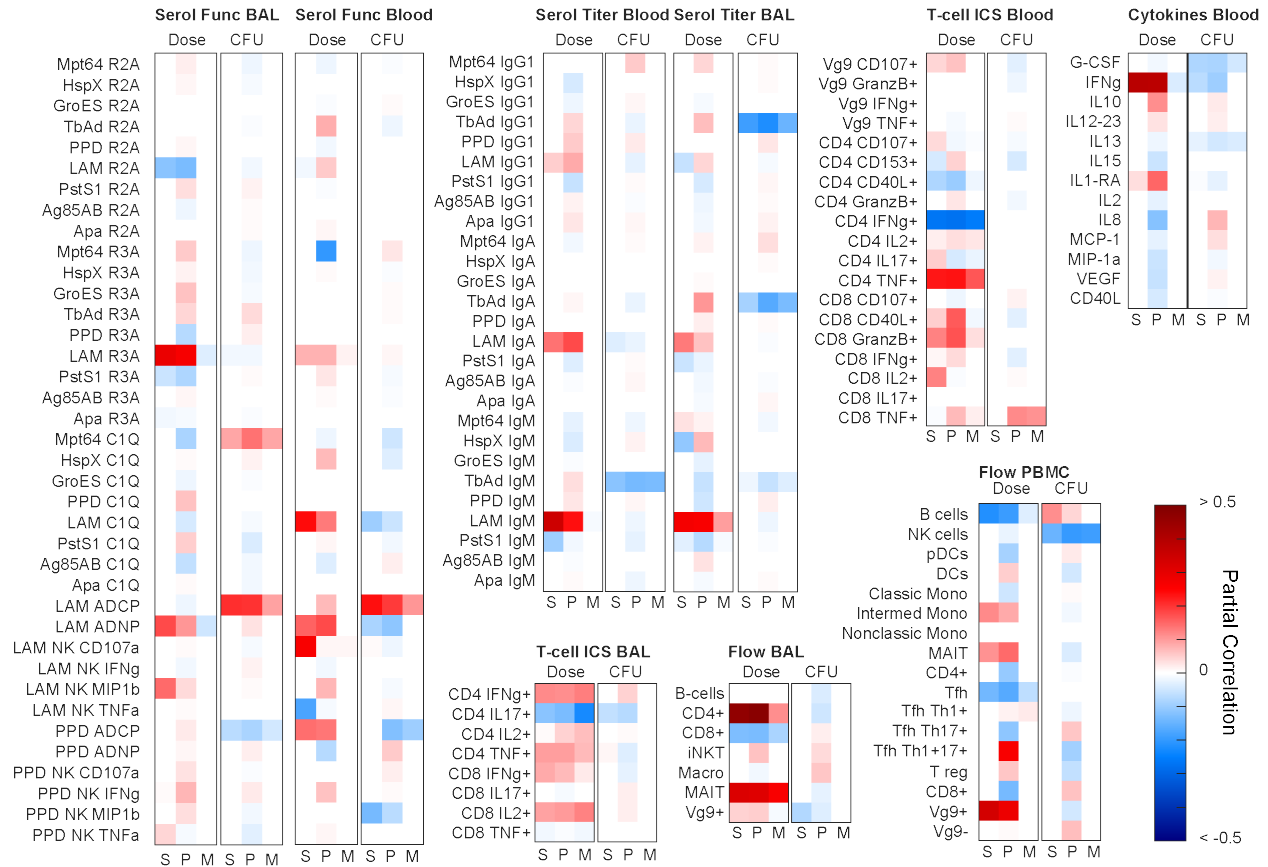

**Figure S2. Comparison of partial correlations for single- and multi-modal PCNs.** Same as Figure 2G, but for each data mode.

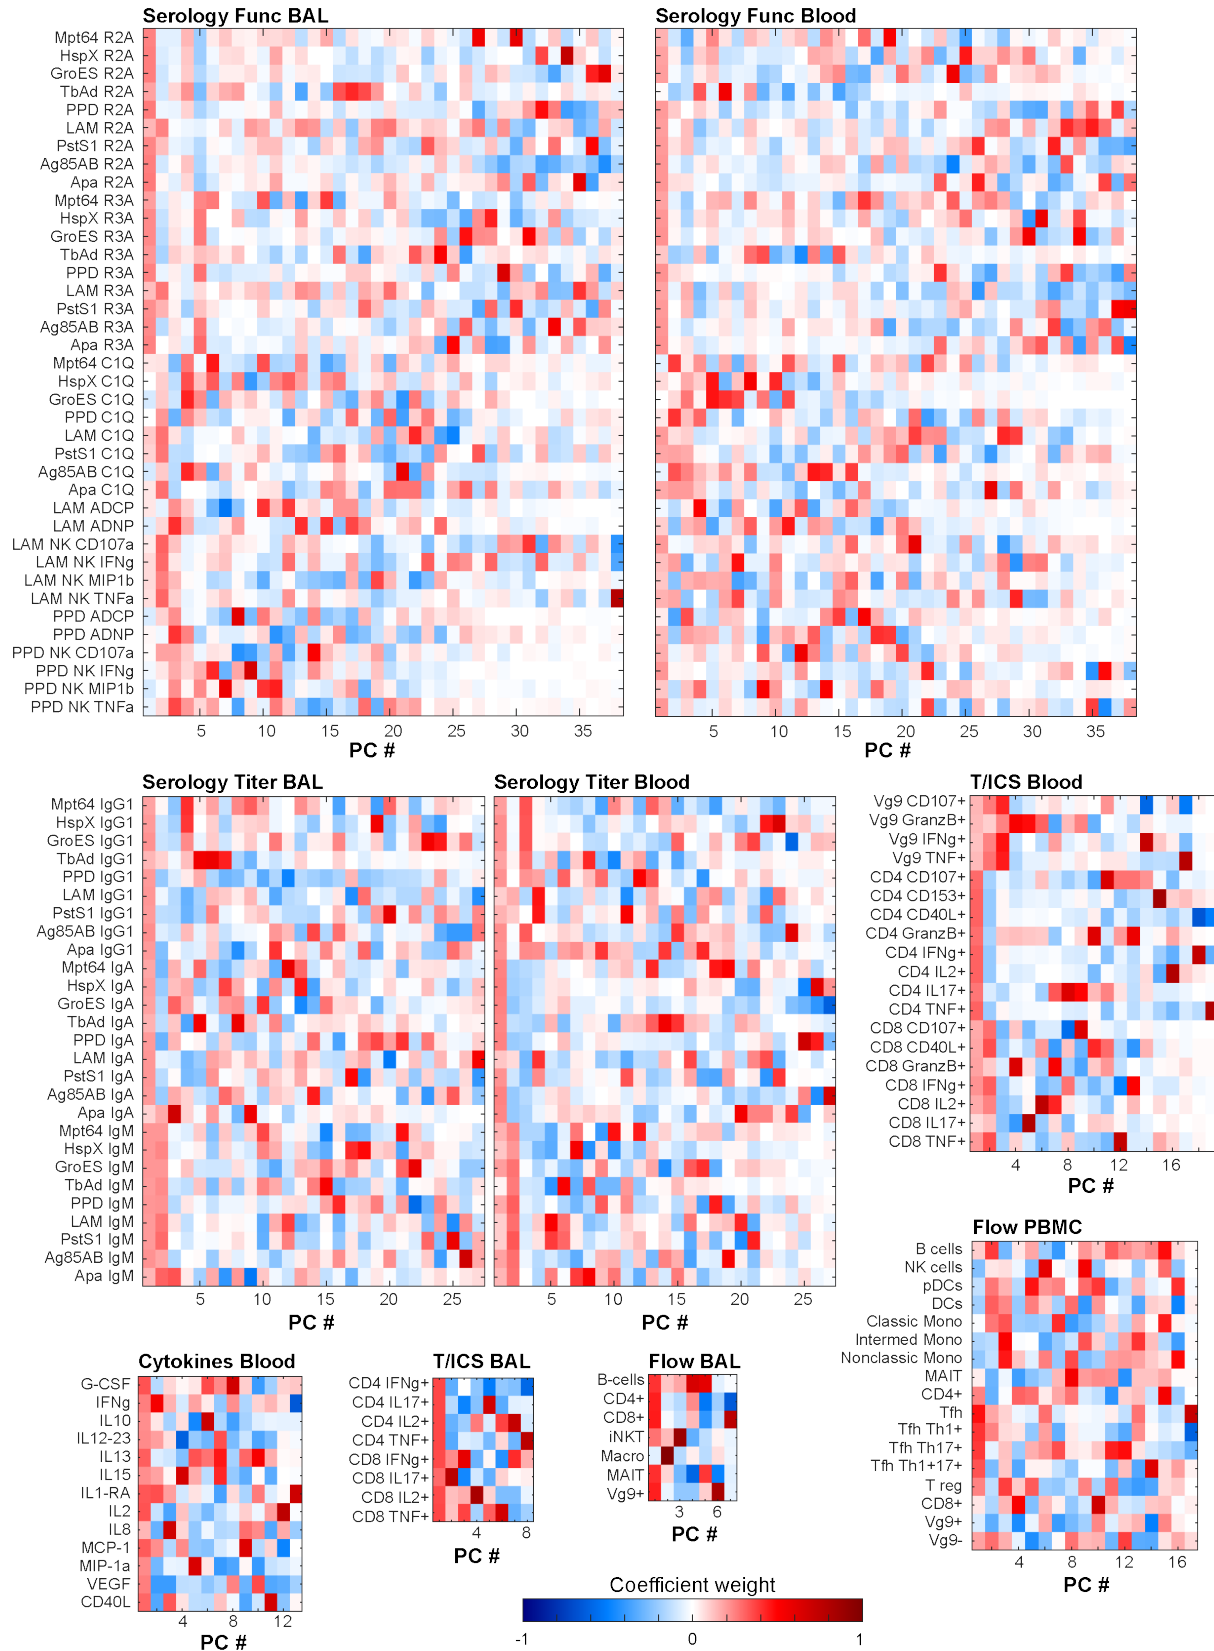

**Figure S3. Principal components of single data modes. Weights of original features of principal components for each data mode.**

## A T cell responses in airways

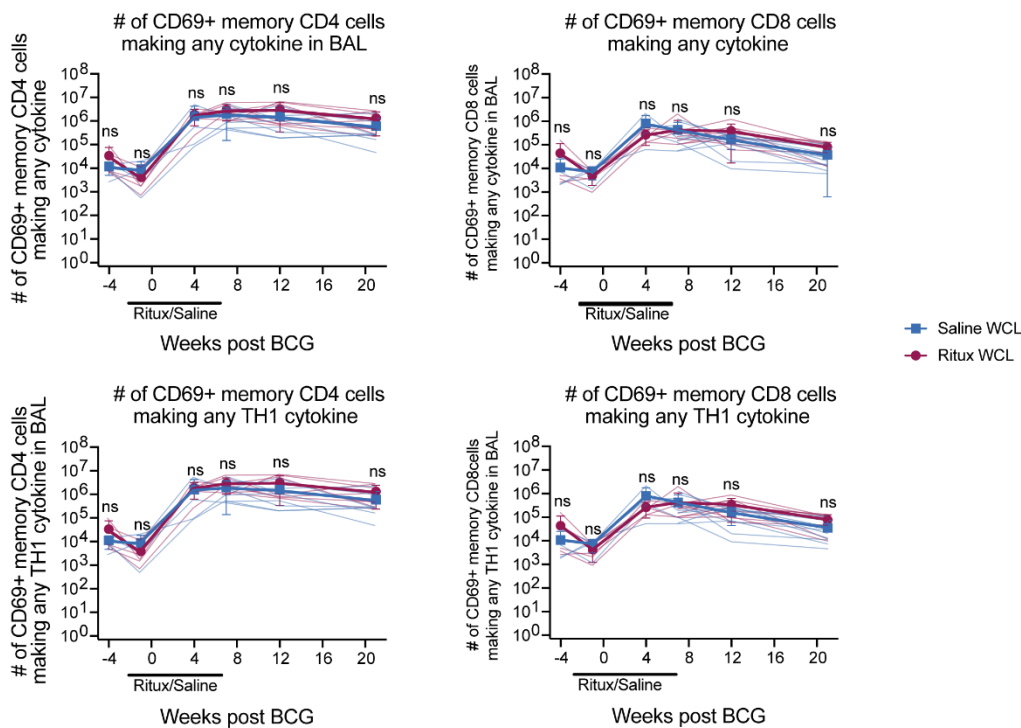

## B CD4 memory T cell response in lungs

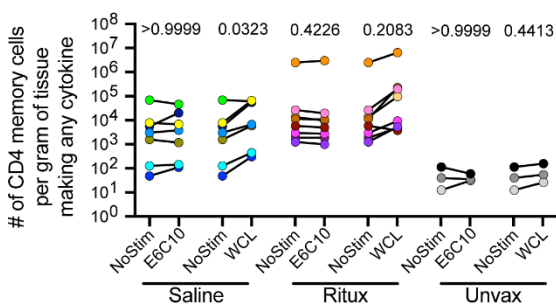

## C CD8 memory T cell response in lungs

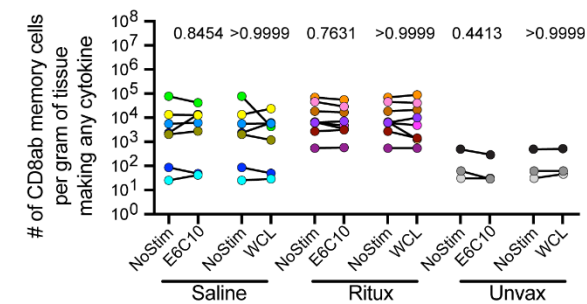

## D Total cell counts in lungs

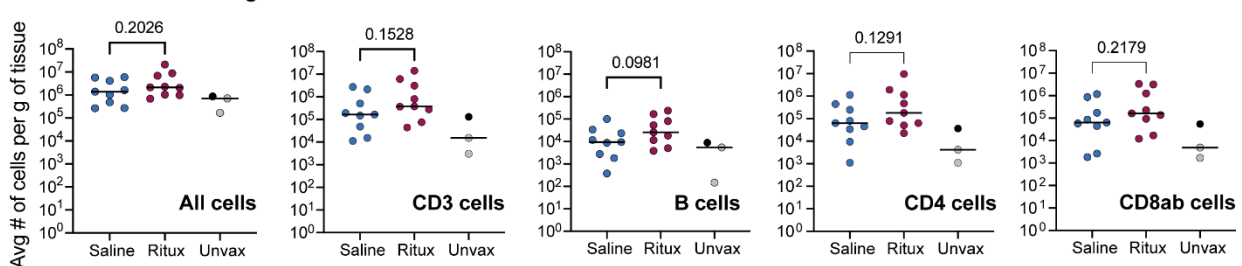

**Figure S4. T cell responses upon B cell depletion.** A) Number of CD4 memory cells in BAL using CD45RA and CD28 to differentiate memory cells via flow cytometry. Rituximab treated animals are shown in blue while saline treated animals are shown in red. Mean and SD shown. Statistics: Multiple Mann-Whitney Tests with Holm-Šidák method adjusted p-values reported: ns -  $p > 0.05$ . B, C) CD4 and CD8ab memory T cells making any cytokine (IFN $\gamma$ , IL-2, TNF $\alpha$  or IL-17) in the lung at time of necropsy. Cells were unstimulated or stimulated with ESAT-6/CFP10 peptides or Whole Cell Lysate (WCL). Each point (colored by animal) represents a median from 3 separate lung lobes from each animal.

Saline group consists of 7 animals, Ritux group 8, and Unvax group 3. Statistics: Friedman test (for paired data) with Dunn's multiple comparison adjusted p-values reported. **D**) Cell counts from hemacytometer count of single cell suspensions at time of necropsy and as measured from cell surface markers during flow cytometry. Statistics: Unpaired t test p-values shown. **B-D**) Black circle represents clinically uninfected animal.

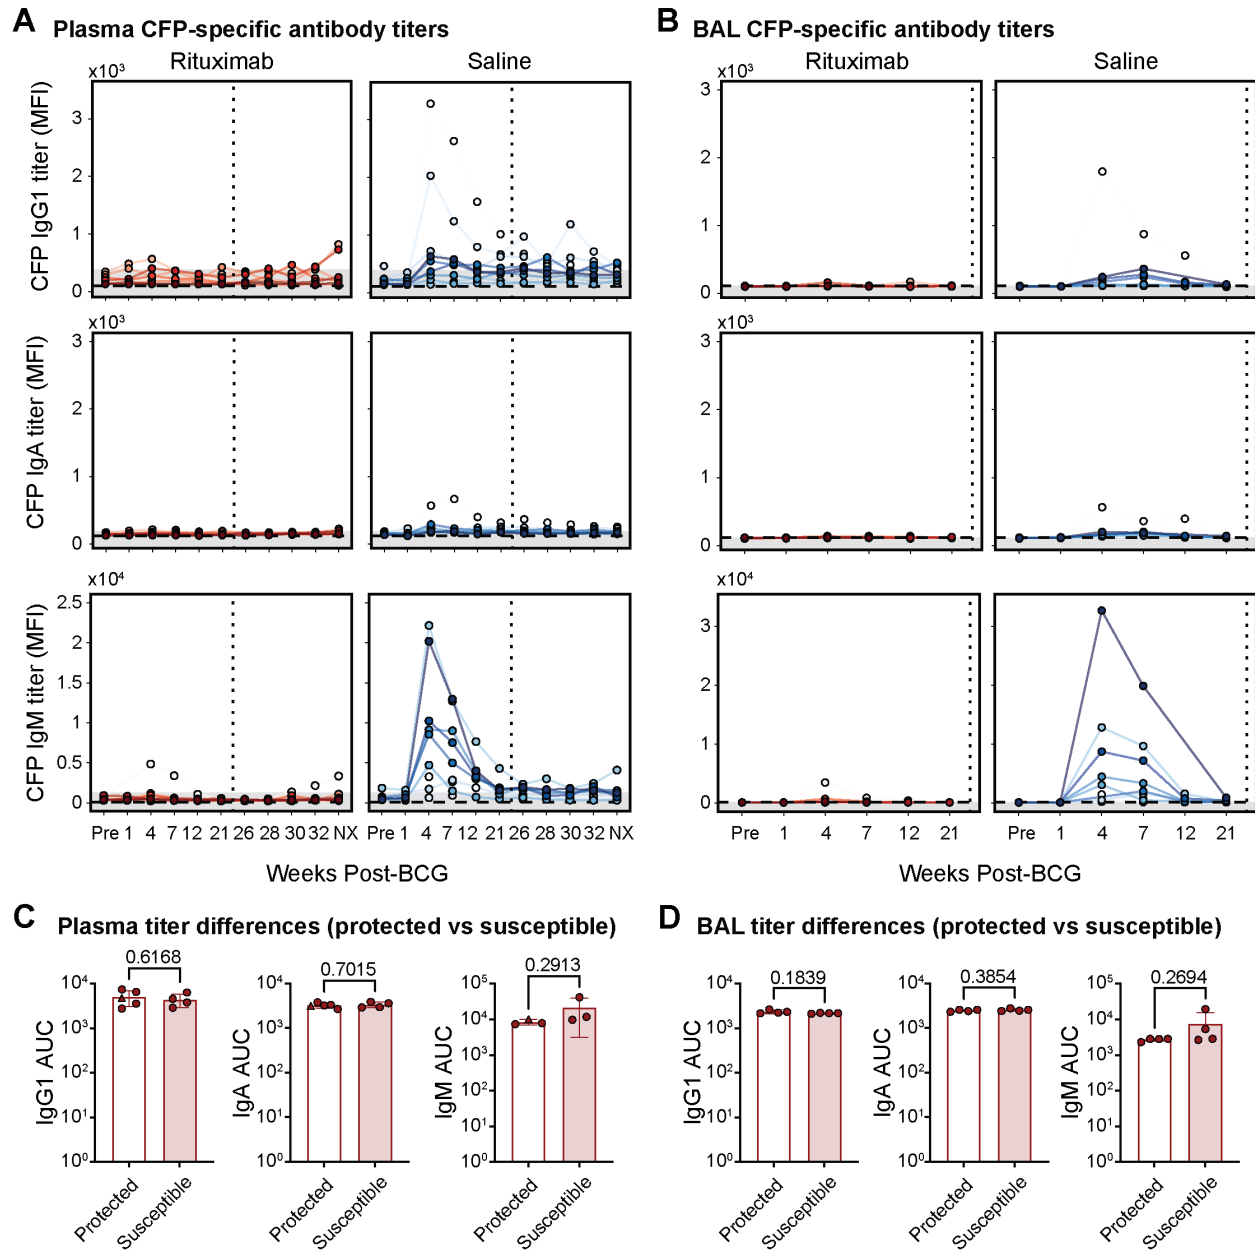

**Figure S5. CFP-specific antibody responses.** **A, B** IgG1 (top), IgA (middle), and IgM (bottom) antibody titers present in the **(A)** plasma, and **(B)** BAL, of each macaque following IV BCG vaccination specific to CFP measured via Luminex. Y-axis is median fluorescence intensity (MFI). X-axis shows time

in weeks, including pre-vaccination at week -4 (Pre) and necropsy at week 38 (NX). Each point represents the duplicate average from a single macaque at the corresponding timepoint. Rituximab-treated macaques are red (left) and saline-treated macaques are blue (right). Vertical dotted line indicates the time of challenge (week 23). Horizontal dashed line is the PBS control. Grey shaded area is the background level set to 2 standard deviations above the mean MFI of the pre-vaccination samples. Measurements at least 2 standard deviations above the mean MFI of the pre-vaccination samples are considered to be above the limit of detection. **C, D**) Comparison of CFP-specific antibody titers between protected (total Mtb CFU = 0) and susceptible (total Mtb CFU > 0) Rituximab-treated macaques in the (C) plasma, and (D) BAL. Area under the curve (AUC) values were calculated using longitudinal Luminex MFI data from the following timepoints: Pre-vaccination (Pre), week 4, 7, 12, and 21. Macaque with 0 Mtb CFU, but residual BCG present in a peripheral lymph node (12620) is represented by the triangle marker. Unadjusted p-values resulting from two-tailed Mann-Whitney U tests are indicated

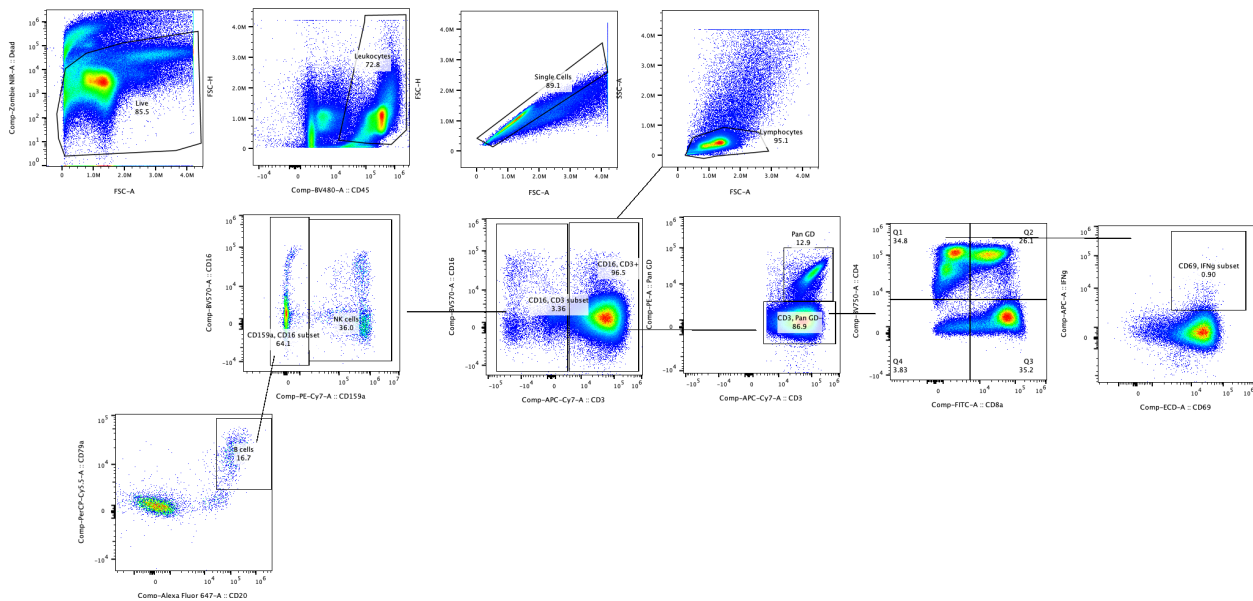

**Figure S6. Gating strategy of BAL for flow cytometry**



|          |                      |                 |     |                         |                            |                                    |
|----------|----------------------|-----------------|-----|-------------------------|----------------------------|------------------------------------|
| Ber-ACT8 | CD103                | BV711           | V13 | Biolegend               | 350222                     | cohort 1 week 7-week 20            |
| 6b11     | iNKT                 | BV711           | V13 | Biolegend               | 342922                     | cohort 1 week -4-20 only           |
| L200     | CD4                  | BV750           | V14 | BD Biosciences          | 747202                     | cohort 1 and 2 all time points     |
| DK25     | CD8a                 | FITC            | B2  | Agilent Technologies    | F076501-1                  | cohort 1 and 2 all time points     |
| HM47     | CD79a                | PerCP-Cy5.5     | B9  | ThermoFisher Scientific | 45-0792-42                 | cohort 1 and 2 all time points     |
| 3D12     | CCR7                 | PerCP-eFluor710 | B10 | ThermoFisher Scientific | 46-1979-42                 | cohort 1 and 2 all time points     |
| 5A6.e9   | Pan gd               | PE              | YG1 | ThermoFisher Scientific | MHGD04                     | cohort 1 and 2 all time points     |
| TP1.55.3 | CD69                 | ECD             | YG3 | Beckman Coulter         | 6607110                    | cohort 1 and 2 all time points     |
| 19.2     | CD206                | PE-Cy5          | YG5 | BD Biosciences          | 551136                     | cohort 1 and 2 all time points     |
| Z199     | CD159a               | PE-Cy7          | YG9 | Beckman Coulter         | B10246                     | cohort 1 and 2 all time points     |
| 2H7      | CD20                 | AF647           | R2  | Biolegend               | 302318                     | cohort 1 and 2 all time points     |
| H4A3     | CD107a               | AF700           | R4  | BD Biosciences          | 561340                     | cohort 1 week 22, cohort 2 pre BCG |
| LN3      | HLA-DR               | AF700           | R4  | ThermoFisher Scientific | 56-9956-42                 | cohort 1 week -4-4 only            |
| 27E10    | Calprotectin, biotin | AF700 (2 step)  | R4  | ThermoFisher Scientific | MA1-40314                  | cohort 1 week 7-12 only            |
| SP34-2   | CD3                  | APC-Cy7         | R7  | BD Biosciences          | 557757 (bulk order 624072) | cohort 1 and 2 all time points     |
| -        | L/D                  | ZombieNIR       | R8  | Biolegend               | 423106                     | cohort 1 and 2 all time points     |

**Table 4. Flow cytometry antibodies for staining BAL in Cohorts 1 & 2**



| Clone     | Marker    | Fluor  | Aurora Channel | Vendor               | Catalog #                          | cohort/time point                  |
|-----------|-----------|--------|----------------|----------------------|------------------------------------|------------------------------------|
| 5H9       | CD45RA    | BUV395 | UV2            | BD Biosciences       | 740315                             | cohort 1 week 7-22, all cohort 2   |
| GHI/61    | CD163     | BUV395 | UV2            | BD Biosciences       | 745572                             | cohort 1 week -4 -4 only           |
| ICRF44    | CD11b     | BUV563 | UV9            | BD Biosciences       | 741357                             | cohort 1 and 2 all time points     |
| 2ST8.5H7  | CD8b      | BUV737 | UV14           | BD Biosciences       | 748324                             | cohort 2 week 12, 22 only          |
| 3.9       | CD11c     | BV421  | V1             | BD Biosciences       | 565806                             | cohort 1 and 2 all time points     |
| GB11      | GranzymeB | V450   | V3             | BD Biosciences       | 561151                             | cohort 1 and 2 all time points     |
| D058-1283 | CD45      | BV480  | V4             | BD Biosciences       | 566145<br>(bulk order<br>(624248)) | cohort 1 and 2 all time points     |
| BL168     | IL-17     | BV510  | V7             | Biolegend            | 512330                             | cohort 1 and 2 all time points     |
| 3G8       | CD16      | BV570  | V8             | Biolegend            | 302036                             | cohort 1 and 2 all time points     |
| CD28.2    | CD28      | BV605  | V10            | Biolegend            | 302968                             | cohort 1 and 2 all time points     |
| Mab11     | TNF       | BV650  | V11            | BD Biosciences       | 563418                             | cohort 1 and 2 all time points     |
| 6b11      | iNKT      | BV711  | V13            | Biolegend            | 342922                             | cohort 1 week -4-20 only           |
| BerACT8   | CD103     | BV711  | V13            | Biolegend            | 350222                             | cohort 1 week 22, cohort 2 pre BCG |
| L200      | CD4       | BV750  | V14            | BD Biosciences       | 747202                             | cohort 1 and 2 all time points     |
| MQ1-17H12 | IL-2      | BV785  | V15            | Biolegend            | 500348                             | cohort 1 and 2 all time points     |
| DK25      | CD8a      | FITC   | B2             | Agilent Technologies | F076501-1                          | cohort 1 and 2 all time points     |

|          |                     |                 |     |                         |                            |                                    |
|----------|---------------------|-----------------|-----|-------------------------|----------------------------|------------------------------------|
| HM47     | CD79a               | PerCP-Cy5.5     | B9  | ThermoFisher Scientific | 45-0792-42                 | cohort 1 and 2 all time points     |
| 3D12     | CCR7                | PerCP-eFluor710 | B10 | ThermoFisher Scientific | 46-1979-42                 | cohort 1 and 2 all time points     |
| 5A6.e9   | Pan gd              | PE              | YG1 | ThermoFisher Scientific | MHGD04                     | cohort 1 and 2 all time points     |
| TP1.55.3 | CD69                | ECD             | YG3 | Beckman Coulter         | 6607110                    | cohort 1 and 2 all time points     |
| 19.2     | CD206               | PE-Cy5          | YG5 | BD Biosciences          | 551136                     | cohort 1 and 2 all time points     |
| Z199     | CD159a              | PE-Cy7          | YG9 | Beckman Coulter         | B10246                     | cohort 1 and 2 all time points     |
| B27      | IFNg                | APC             | R1  | Biolegend               | 506510                     | cohort 1 and 2 all time points     |
| 2H7      | CD20                | AF647           | R2  | Biolegend               | 302318                     | cohort 1 and 2 all time points     |
| LN3      | HLA-DR              | AF700           | R4  | ThermoFisher Scientific | 56-9956-42                 | cohort 1 week -4 -4 only           |
| 27E10    | Calprotectin biotin | AF700 (2 step)  | R4  | ThermoFisher Scientific | MA1-40314                  | cohort 1 week 7-12 only            |
| H4A3     | CD107a              | AF700           | R4  | BD Biosciences          | 561340                     | cohort 1 week 22, cohort 2 pre BCG |
| SP34-2   | CD3                 | APC-Cy7         | R7  | BD Biosciences          | 557757 (bulk order 624072) | cohort 1 and 2 all time points     |
| -        | L/D                 | ZombieNIR       | R8  | Biolegend               | 423106                     | cohort 1 and 2 all time points     |

**Table 5. Flow cytometry antibodies for staining lung cells at time of necropsy in Cohorts 1 & 2**

| Clone  | Marker | Fluor  | Aurora Channel | Vendor         | Catalog # | cohort/time point              |
|--------|--------|--------|----------------|----------------|-----------|--------------------------------|
| 5H9    | CD45RA | BUV395 | UV2            | BD Biosciences | 740315    | cohort 1 and 2 all time points |
| ICRF44 | CD11b  | BUV563 | UV9            | BD Biosciences | 741357    | cohort 1 and 2 all time points |

|               |           |                     |      |                            |                                   |                                   |
|---------------|-----------|---------------------|------|----------------------------|-----------------------------------|-----------------------------------|
| 2ST8.5H7      | CD8b      | BUV737              | UV14 | BD Biosciences             | 748324                            | cohort 1 and 2<br>all time points |
| 3.9           | CD11c     | BV421               | V1   | BD Biosciences             | 565806                            | cohort 1 and 2<br>all time points |
| GB11          | GranzymeB | V450                | V3   | BD Biosciences             | 561151                            | cohort 1 and 2<br>all time points |
| D058-1283     | CD45      | BV480               | V4   | BD Biosciences             | 566145 (bulk<br>order<br>(624248) | cohort 1 and 2<br>all time points |
| BL168         | IL-17     | BV510               | V7   | Biolegend                  | 512330                            | cohort 1 and 2<br>all time points |
| 3G8           | CD16      | BV570               | V8   | Biolegend                  | 302036                            | cohort 1 and 2<br>all time points |
| CD28.2        | CD28      | BV605               | V10  | Biolegend                  | 302968                            | cohort 1 and 2<br>all time points |
| Mab11         | TNF       | BV650               | V11  | BD Biosciences             | 563418                            | cohort 1 and 2<br>all time points |
| Ber-ACT8      | CD103     | BV711               | V13  | Biolegend                  | 350222                            | cohort 1 and 2<br>all time points |
| L200          | CD4       | BV750               | V14  | BD Biosciences             | 747202                            | cohort 1 and 2<br>all time points |
| MQ1-<br>17H12 | IL-2      | BV785               | V15  | Biolegend                  | 500348                            | cohort 1 and 2<br>all time points |
| DK25          | CD8a      | FITC                | B2   | Agilent<br>Technologies    | F076501-1                         | cohort 1 and 2<br>all time points |
| HM47          | CD79a     | PerCP-Cy5.5         | B9   | ThermoFisher<br>Scientific | 45-0792-42                        | cohort 1 and 2<br>all time points |
| 3D12          | CCR7      | PerCP-<br>eFluor710 | B10  | ThermoFisher<br>Scientific | 46-1979-42                        | cohort 1 and 2<br>all time points |
| 5A6.e9        | Pan gd    | PE                  | YG1  | ThermoFisher<br>Scientific | MHGD04                            | cohort 1 and 2<br>all time points |
| TP1.55.3      | CD69      | ECD                 | YG3  | Beckman Coulter            | 6607110                           | cohort 1 and 2<br>all time points |
| H4A3          | CD107a    | PE-Cy5              | YG5  | BD                         | 555802                            | cohort 1 and 2<br>all time points |

|        |        |           |     |                 |                                  |                                   |
|--------|--------|-----------|-----|-----------------|----------------------------------|-----------------------------------|
| Z199   | CD159a | PE-Cy7    | YG9 | Beckman Coulter | B10246                           | cohort 1 and 2<br>all time points |
| B27    | IFNg   | APC       | R1  | Biolegend       | 506510                           | cohort 1 and 2<br>all time points |
| 2H7    | CD20   | AF647     | R2  | Biolegend       | 302318                           | cohort 1 and 2<br>all time points |
| SP34-2 | CD3    | APC-Cy7   | R7  | BD Biosciences  | 557757 (bulk<br>order<br>624072) | cohort 1 and 2<br>all time points |
| -      | L/D    | ZombieNIR | R8  | Biolegend       | 423106                           | cohort 1 and 2<br>all time points |
